# Supplementary material for: Increased body mass index is linked to systemic inflammation through altered chromatin co-accessibility in human preadipocytes
Source: PubMed Central journal article supplement (PMC10349101; doi:10.1038/s41467-023-39919-y), 2023-07-14
Supplement: 41467_2023_39919_MOESM1_ESM.pdf [file 41467_2023_39919_MOESM1_ESM.pdf]

**Supplementary Table 1. ATAC-seq processing and quality control (QC) summary.**

| QC metric                             | mean       | sd         | range                    |
|---------------------------------------|------------|------------|--------------------------|
| Mean insert size                      | 195        | 18         | 137 - 227                |
| Fraction of reads uniquely aligned    | 0.730      | 0.032      | 0.657 - 0.773            |
| Fraction of reads that are duplicates | 0.069      | 0.029      | 0.045 - 0.204            |
| Fraction of reads aligned to Mt       | 0.006      | 0.004      | 0.001 - 0.018            |
| Final read count                      | 69,671,524 | 15,146,435 | 41,096,376 - 106,257,726 |
| NRF                                   | 0.848      | 0.041      | 0.703 - 0.912            |
| PBC1                                  | 0.877      | 0.032      | 0.743 - 0.92             |
| PBC2                                  | 9.833      | 1.952      | 4.19 - 13.263            |
| FRiP                                  | 0.597      | 0.114      | 0.358 - 0.746            |
| Number of peaks called                | 126,697    | 13,797     | 96,917 - 155,012         |

Mt indicates mitochondria; NRF, non-redundant fraction; PBC, PCR bottlenecking coefficient; FRiP, fraction of reads in peaks; and sd, standard deviation. Only samples that passed QC (n=40; this includes 33 independent samples and 7 isogenic biological replicates from the same individual) are included in the summary. Among the failed samples, one pair (n=2) of twins failed the differentiation step; one sample had poor tagmentation and did not exhibit the proper fragment size distribution; 4 samples did not pass library complexity thresholds, as defined by the ENCODE ATAC-seq Data Standards; and one sample had too few sequencing reads. Source data are provided as a Source Data file.

**Supplementary Table 2. RNA-seq processing and QC summary.**

| QC metric                             | mean       | sd         | range                    |
|---------------------------------------|------------|------------|--------------------------|
| RIN                                   | 9.98       | 0.041      | 9.9 - 10                 |
| Fraction of reads uniquely aligned    | 0.931      | 0.007      | 0.913 - 0.942            |
| Number of reads correct strand        | 59,247,414 | 22,237,588 | 21,729,476 - 127,517,226 |
| Fraction of reads that are coding     | 0.645      | 0.009      | 0.628 - 0.662            |
| Fraction of reads that are UTR        | 0.3        | 0.006      | 0.286 - 0.308            |
| Fraction of reads that are intronic   | 0.038      | 0.005      | 0.03 - 0.049             |
| Fraction of reads that are intergenic | 0.018      | 0.001      | 0.016 - 0.02             |
| Median 5' bias                        | 0.114      | 0.021      | 0.071 - 0.147            |
| Median 3' bias                        | 0.143      | 0.042      | 0.076 - 0.19             |
| Median 5' to 3' bias                  | 0.889      | 0.092      | 0.689 - 1.097            |

RIN indicates RNA integrity number; and UTR, untranslated region. Source data are provided as a Source Data file.

**Supplementary Table 3. Promoter Capture Hi-C sequencing read processing metrics.**

|                 | <b>Reads</b> | <b>Uniquely mapped and paired</b> | <b>Unique ditags*</b> | <b>On-target reads</b> | <b>Capture efficiency</b> |
|-----------------|--------------|-----------------------------------|-----------------------|------------------------|---------------------------|
| <b>PAd rep1</b> | 106,651,878  | 77,323,631                        | 46,453,815            | 37,763,852             | 0.813                     |
| <b>PAd rep2</b> | 91,792,535   | 68,885,423                        | 39,354,816            | 32,404,037             | 0.823                     |

PAd indicates preadipocytes; and \* indicates the unique ditag reads that remain after deduplication and filtering for technical artifacts in HiCUP<sup>1</sup>.

**Supplementary Table 4. Related to Figure 3. The A compartment cluster numbers and Mb spanned.**

| <b>A compartment cluster</b> | <b># of A compartments in cluster</b> | <b>Total Mb</b> | <b># of A compartments with altered co-accessibility in cluster</b> | <b>Total Mb (altered co-accessibility)</b> |
|------------------------------|---------------------------------------|-----------------|---------------------------------------------------------------------|--------------------------------------------|
| 1                            | 145                                   | 129             | 30                                                                  | 37.3                                       |
| 2                            | 144                                   | 88.8            | 39                                                                  | 32.5                                       |
| 3                            | 107                                   | 42.6            | 13                                                                  | 5.0                                        |
| 4                            | 156                                   | 52.8            | 8                                                                   | 1.8                                        |
| 5                            | 138                                   | 60.6            | 11                                                                  | 4.0                                        |
| 6                            | 137                                   | 39.3            | 1                                                                   | 0.1                                        |
| 7                            | 193                                   | 78.1            | 7                                                                   | 4.0                                        |
| 8                            | 121                                   | 27.1            | 6                                                                   | 1.1                                        |
| 9                            | 180                                   | 69.2            | 4                                                                   | 2.4                                        |
| 10                           | 230                                   | 62.3            | 2                                                                   | 0.3                                        |

Source data are from Supplementary Data 4.

**Supplementary Table 5. Results from the *de novo* HOMER transcription factor motif enrichment analysis on the A compartment clusters.**

| <b>A compartment cluster</b> | <b>TF motif</b> | <b><i>p</i>-value</b> |
|------------------------------|-----------------|-----------------------|
| 1                            | MEIS2           | 10 <sup>-24</sup>     |
| 1                            | ZNF416          | 10 <sup>-23</sup>     |
| 1                            | ZNF165          | 10 <sup>-22</sup>     |
| 1                            | ZNF460*         | 10 <sup>-21</sup>     |
| 1                            | Zbtb3*          | 10 <sup>-21</sup>     |
| 1                            | SREBF1          | 10 <sup>-19</sup>     |
| 1                            | Zbtb3*          | 10 <sup>-18</sup>     |
| 1                            | ZNF135          | 10 <sup>-17</sup>     |
| 1                            | YY2             | 10 <sup>-16</sup>     |
| 1                            | KLF3            | 10 <sup>-15</sup>     |
| 1                            | Sp4             | 10 <sup>-14</sup>     |
| 1                            | ZNF460*         | 10 <sup>-14</sup>     |
| 1                            | IRC900814       | 10 <sup>-14</sup>     |
| 1                            | YY1             | 10 <sup>-13</sup>     |
| 1                            | POU5F1          | 10 <sup>-13</sup>     |
| 1                            | PBX3            | 10 <sup>-13</sup>     |
| 1                            | Irf6            | 10 <sup>-13</sup>     |
| 1                            | GLI3            | 10 <sup>-12</sup>     |
| 1                            | Bcl11a          | 10 <sup>-12</sup>     |
| 1                            | PITX2           | 10 <sup>-12</sup>     |
| 2                            | WT1             | 10 <sup>-13</sup>     |
| 3                            | NR4A2           | 10 <sup>-13</sup>     |
| 3                            | MSANTD3         | 10 <sup>-13</sup>     |
| 3                            | MEIS1           | 10 <sup>-12</sup>     |
| 3                            | HNF4G           | 10 <sup>-12</sup>     |
| 3                            | NFATC4          | 10 <sup>-12</sup>     |
| 5                            | ZNF341          | 10 <sup>-17</sup>     |
| 5                            | Arid3a          | 10 <sup>-15</sup>     |
| 5                            | Gata5           | 10 <sup>-15</sup>     |
| 5                            | CHR             | 10 <sup>-14</sup>     |
| 5                            | Tcfap2a         | 10 <sup>-13</sup>     |
| 5                            | EGR2            | 10 <sup>-13</sup>     |
| 5                            | REL             | 10 <sup>-13</sup>     |
| 5                            | Six1*           | 10 <sup>-13</sup>     |

|           |         |                   |
|-----------|---------|-------------------|
| <b>5</b>  | ZKSCAN5 | 10 <sup>-13</sup> |
| <b>5</b>  | Six1*   | 10 <sup>-13</sup> |
| <b>5</b>  | TBP     | 10 <sup>-12</sup> |
| <b>5</b>  | Sox8    | 10 <sup>-12</sup> |
| <b>5</b>  | Sox18   | 10 <sup>-12</sup> |
| <b>5</b>  | ZNF768  | 10 <sup>-12</sup> |
| <b>5</b>  | ZNF652  | 10 <sup>-12</sup> |
| <b>5</b>  | HOXB4   | 10 <sup>-12</sup> |
| <b>7</b>  | Pdx1    | 10 <sup>-12</sup> |
| <b>8</b>  | ZNF415  | 10 <sup>-12</sup> |
| <b>10</b> | Mef2a   | 10 <sup>-20</sup> |
| <b>10</b> | ZNF135  | 10 <sup>-16</sup> |
| <b>10</b> | Irf4    | 10 <sup>-15</sup> |
| <b>10</b> | bZIP    | 10 <sup>-14</sup> |
| <b>10</b> | ZFP57   | 10 <sup>-13</sup> |
| <b>10</b> | Six1    | 10 <sup>-13</sup> |
| <b>10</b> | RUNX2   | 10 <sup>-12</sup> |
| <b>10</b> | ZBTB26  | 10 <sup>-12</sup> |

ATAC-seq peaks in interacting promoters and enhancers within the indicated A compartment cluster were assessed for TF motif enrichment using HOMER<sup>2</sup>, with all interacting peaks in other clusters as background. Asterisks \* indicate motifs that were identified more than once in the *de novo* sequence identification. *P*-values correspond to the hypergeometric test for overrepresentation (one-sided) of the indicated motif in the indicated A compartment cluster peaks relative to the peaks in the background set (*i.e.*, all other clusters).

**Supplementary Table 6. The WGCNA gene co-expression module enrichment in the A compartment cluster 1 regions.**

| WGCNA module | Enrichment | $p_{\text{hyper}}$ | $p_{\text{adj}}$ |
|--------------|------------|--------------------|------------------|
| turquoise    | 0.83       | 1.00E+00           | 1.00E+00         |
| lightcyan    | 1.15       | 1.28E-01           | 1.00E+00         |
| greenyellow  | 0.69       | 1.00E+00           | 1.00E+00         |
| black        | 1.34       | 2.15E-17           | 3.01E-15         |
| brown        | 0.99       | 6.53E-01           | 1.00E+00         |
| blue         | 0.85       | 1.00E+00           | 1.00E+00         |
| pink         | 0.93       | 8.10E-01           | 1.00E+00         |
| purple       | 1.53       | 2.08E-08           | 2.92E-06         |
| red          | 1.14       | 3.03E-02           | 1.00E+00         |
| magenta      | 0.68       | 1.00E+00           | 1.00E+00         |
| salmon       | 0.86       | 9.19E-01           | 1.00E+00         |
| grey60       | 0.40       | 1.00E+00           | 1.00E+00         |
| tan          | 1.11       | 1.54E-01           | 1.00E+00         |
| midnightblue | 1.19       | 6.23E-02           | 1.00E+00         |

Genes in the indicated WGCNA<sup>3</sup> co-expression module were assessed for their enrichment (hypergeometric test for overrepresentation (one-sided) and adjusted for multiple testing using the Bonferroni procedure) in the A compartment cluster 1 regions. The black and purple module genes are significantly enriched in these regions. The co-expression modules are randomly assigned color coding for the naming of the modules, and are directly from the WGCNA output. Source data are from Supplementary Table 5.

**Supplementary Table 7. TF motif enrichment for the 52 DE genes in the reprogrammed A compartments.**

| <i>De novo</i> motif best TF match | Proportion of targets with motif | Proportion of background with motif | Enrichment ratio | P-value  |
|------------------------------------|----------------------------------|-------------------------------------|------------------|----------|
| MEF2C                              | 0.0605                           | 0.0235                              | 2.6              | 1.00E-14 |
| ZNF449                             | 0.2679                           | 0.1875                              | 1.4              | 1.00E-13 |
| KLF7                               | 0.3092                           | 0.2296                              | 1.3              | 1.00E-12 |
| ZBTB12                             | 0.4754                           | 0.3863                              | 1.2              | 1.00E-12 |

ATAC-seq peaks in the 52 DE genes regions (gene body +/- 250 kb) were assessed for TF motif enrichment using HOMER<sup>2</sup>, with all peaks in the A compartment cluster 1 black co-expression module genes (gene body +/- 250 kb) as background. *P*-values correspond to the hypergeometric test for overrepresentation (one-sided) of the indicated motif in the reprogrammed A compartment cluster 1 peaks relative to the non-reprogrammed A compartment cluster 1 peaks.



**Supplementary Table 8. Cardiometabolic trait GWAS SNPs (all passing genome-wide significance with  $p < 5 \times 10^{-8}$ ) landing in the DE gene expression-correlated ATAC-seq peaks.**

| <b>A compartment</b> | <b>Peak ID</b> | <b>SNP ID</b>  | <b>CMD trait</b>                                 |
|----------------------|----------------|----------------|--------------------------------------------------|
| chr12_A_comp30       | Peak_41090     | rs11170386     | Diastolic.blood.pressure                         |
| chr12_A_comp30       | Peak_41109     | rs11170481     | Lung.function.(FVC)                              |
| chr17_A_comp12       | Peak_72867     | rs777657075    | Waist-hip.index                                  |
| chr17_A_comp12       | Peak_72867     | rs777657075    | Waist-to-hip.ratio.adjusted.for.BMI              |
| chr17_A_comp12       | Peak_72897     | rs2297508      | Type.2.diabetes                                  |
| chr17_A_comp1        | Peak_71319     | rs141977343    | Hip.index                                        |
| chr17_A_comp1        | Peak_71319     | rs2295480      | Hip.index                                        |
| chr17_A_comp1        | Peak_71422     | rs34582191     | Lung.function.(FVC)                              |
| chr17_A_comp1        | Peak_71447     | rs11078597     | C-reactive.protein                               |
| chr17_A_comp1        | Peak_71447     | rs11078597     | Liver.enzyme.levels.(alkaline.phosphatase)       |
| chr17_A_comp1        | Peak_71447     | rs11078597     | Triglyceride.levels                              |
| chr17_A_comp1        | Peak_71448     | rs58360980     | Waist.circumference.adjusted.for.body.mass.index |
| chr17_A_comp1        | Peak_71491     | rs112963849    | Hypertension                                     |
| chr17_A_comp1        | Peak_71492     | rs3803809      | Lung.function.(FVC)                              |
| chr17_A_comp1        | Peak_71492     | rs4790310*     | Apolipoprotein.A1.levels                         |
| chr17_A_comp1        | Peak_71492     | rs4790310*     | HDL.cholesterol                                  |
| chr17_A_comp1        | Peak_71497     | rs3760230*     | Apolipoprotein.A1.levels                         |
| chr17_A_comp1        | Peak_71497     | rs3760230*     | Nonalcoholic.fatty.liver.disease.(imputed)       |
| chr17_A_comp1        | Peak_71511     | rs2281727±     | Body.mass.index                                  |
| chr17_A_comp1        | Peak_71513     | rs7217226±     | Body.mass.index                                  |
| chr17_A_comp1        | Peak_71513     | rs7217226±     | Waist-hip.ratio                                  |
| chr17_A_comp1        | Peak_71538     | rs57513571     | Appendicular.lean.mass                           |
| chr6_A_comp26        | Peak_155187    | rs386906       | Appendicular.lean.mass                           |
| chr7_A_comp52        | Peak_170800    | chr7:100295908 | Type.2.diabetes                                  |
| chr7_A_comp52        | Peak_170806    | rs2405442      | Lung.function.(FEV1/FVC)                         |

Only associations reaching genome-wide significance in the GWAS catalog<sup>4</sup> are listed. \*

indicates variants that are in linkage disequilibrium (LD) ( $r^2=0.93$ ); ± indicates variants that are

in LD ( $r^2=0.92$ ).

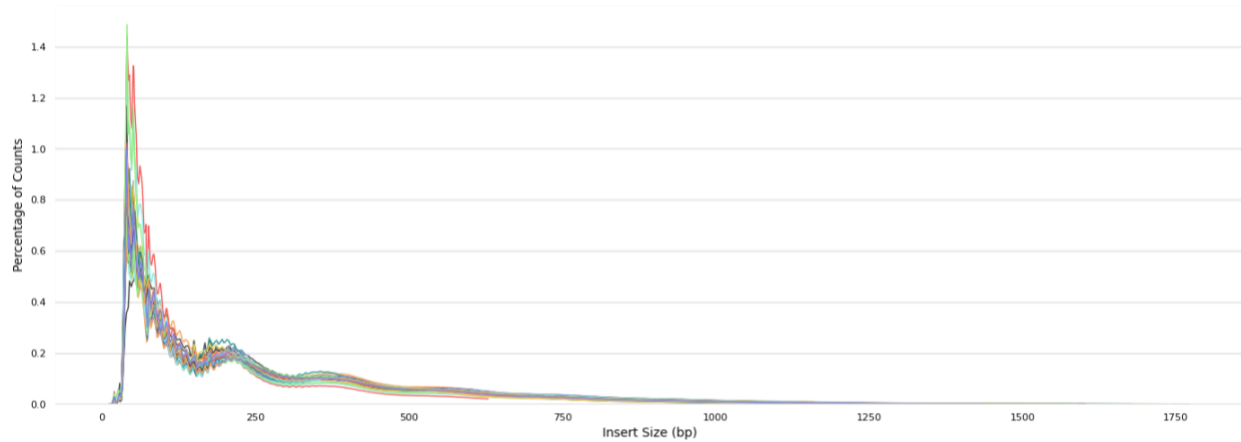

**Supplementary Figure 1. ATAC-seq insert size distribution.**

The distribution of the ATAC-seq library fragment insert sizes (x-axis) for all 40 samples that passed QC (see Supplementary Table 1; Methods), presented as the proportion of reads (y-axis) in each sample library containing the indicated fragment size. The periodicity corresponds to nucleosome-free regions (peak between 0-100 bp), mononucleosome regions (peak between 150-250 bp), dinucleosome regions (peak between 300-400 bp), and so on. Plot is the output from MultiQC<sup>5</sup>. Source data are provided as a Source Data file.

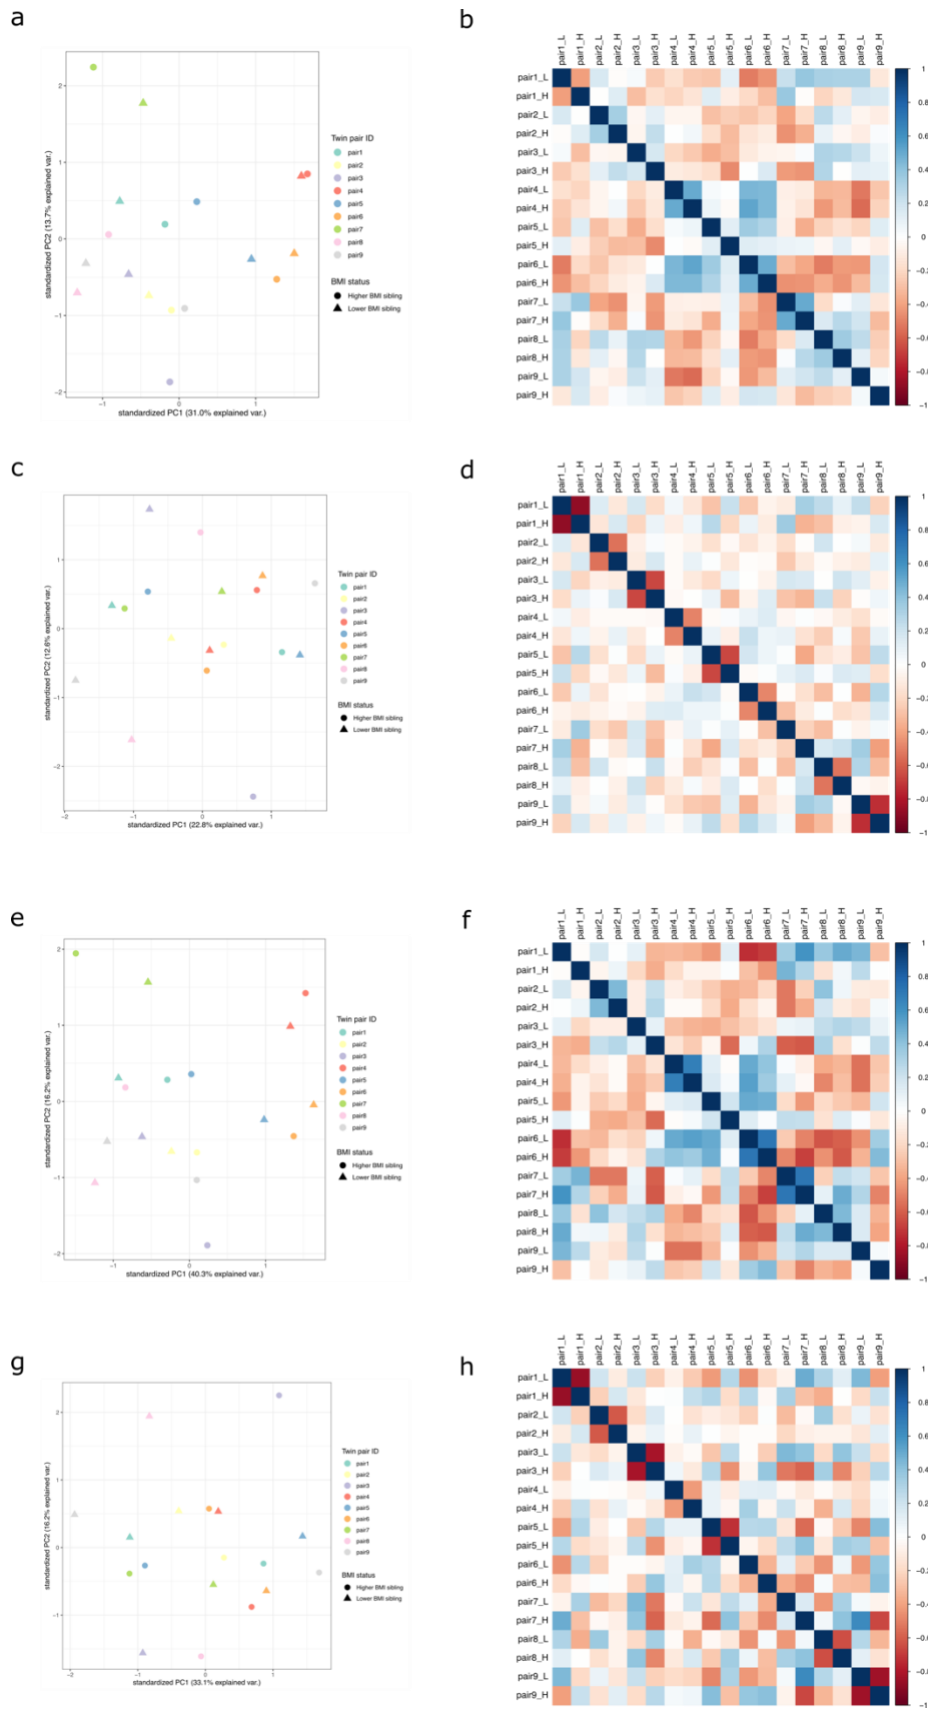

Supplementary Figure 2. Related to Figure 1.

Preadipocyte (PAd) ATAC-seq sample PCA and pairwise correlations on individual peak TPMs (a-d) or 100-kb bin TPMs (e-h). TPMs were first adjusted for sex, age, and fraction of reads in peaks (FRiP) to show that these BMI-discordant MZ twin pairs generally cluster near each other in the PCA plot (a, e) and exhibit positive correlations with each other (b, f), although this is not the case for all pairs. TPMs were adjusted for the family ID as a random effect, sex, age and fraction of reads in peaks (FRiP) (see Methods) and the resulting PCA plot (c, g) and correlation plot (d, h) are shown, wherein clustering is no longer twin pair ID -dependent. L indicates the lower BMI sibling within the MZ twin pairs; and H indicates the higher BMI sibling within the MZ twin pairs. Source data are provided as a Source Data file.

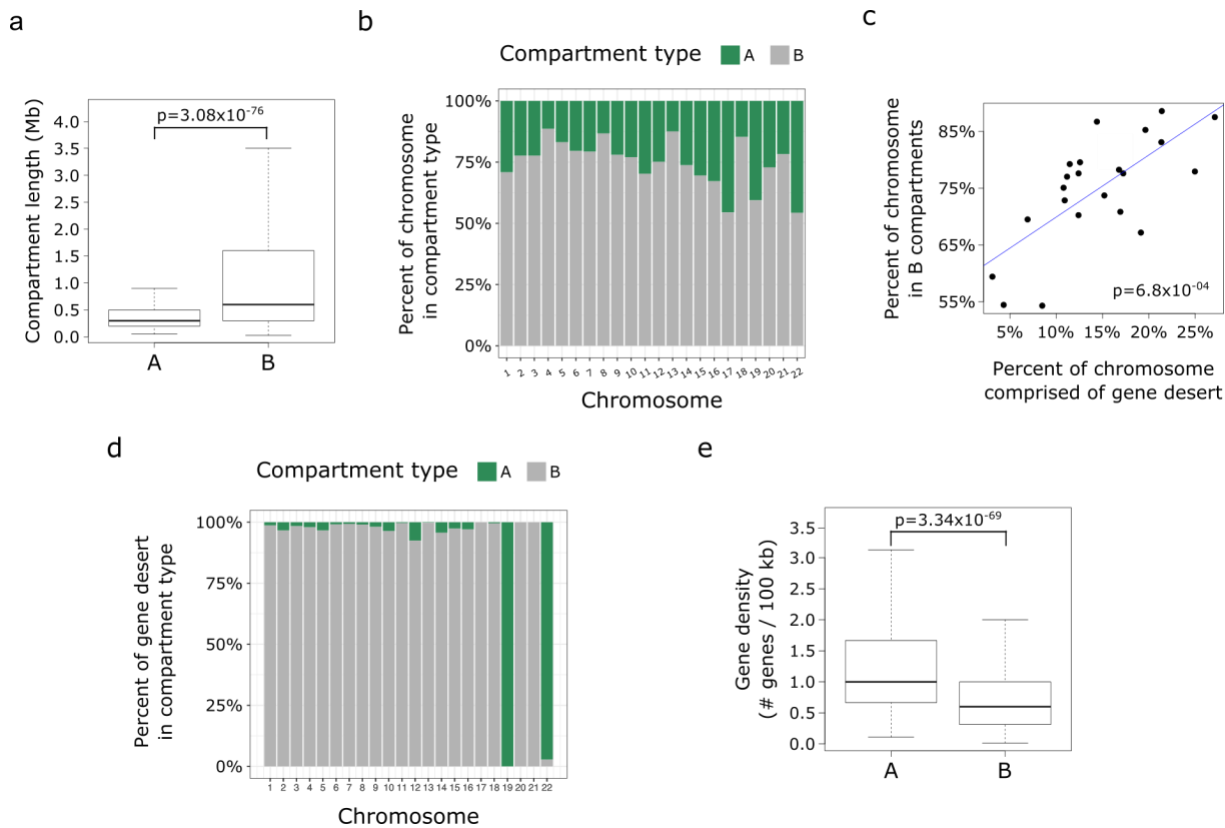

**Supplementary Figure 3. Related to Figure 1. A/B compartment detection in preadipocytes reflects known genomic hallmarks of A and B compartments.**

(a) Boxplots show the distribution of A/B compartment lengths. Outliers have been removed for clarity. The  $p$ -value corresponds to the two-sided Wilcoxon Rank Sum test comparing the lengths between the A ( $n=1,551$  compartments) and B ( $n=1,557$  compartments) compartments. (b) Bar plots show the proportion of each chromosome that makes up A/B compartments. (c) Scatterplot shows the relationship between the proportion of chromosomes made up of gene deserts, and the proportion of chromosomes made up of B compartments. The  $p$ -value corresponds to the significance of the Spearman's rank correlation coefficient. (d) Bar plots show the percent of gene deserts that overlap A or B compartments. (e) Boxplots show the gene density distribution in A/B compartments. Outliers have been removed for clarity. The  $p$ -value corresponds to the two-sided Wilcoxon Rank Sum test comparing the gene density between the A ( $n=1,278$  compartments with at least one gene) and B ( $n=1,399$  compartments with at

least one gene) compartments. For all boxplots, the center represents the median gene density of the compartment type, the upper and lower bounds of the box represent the 75<sup>th</sup> and 25<sup>th</sup> percentile, respectively, and the upper and lower whiskers represent the highest (non-outlier) and lowest (non-outlier) values, respectively. Source data are provided as a Source Data file.

Cell type

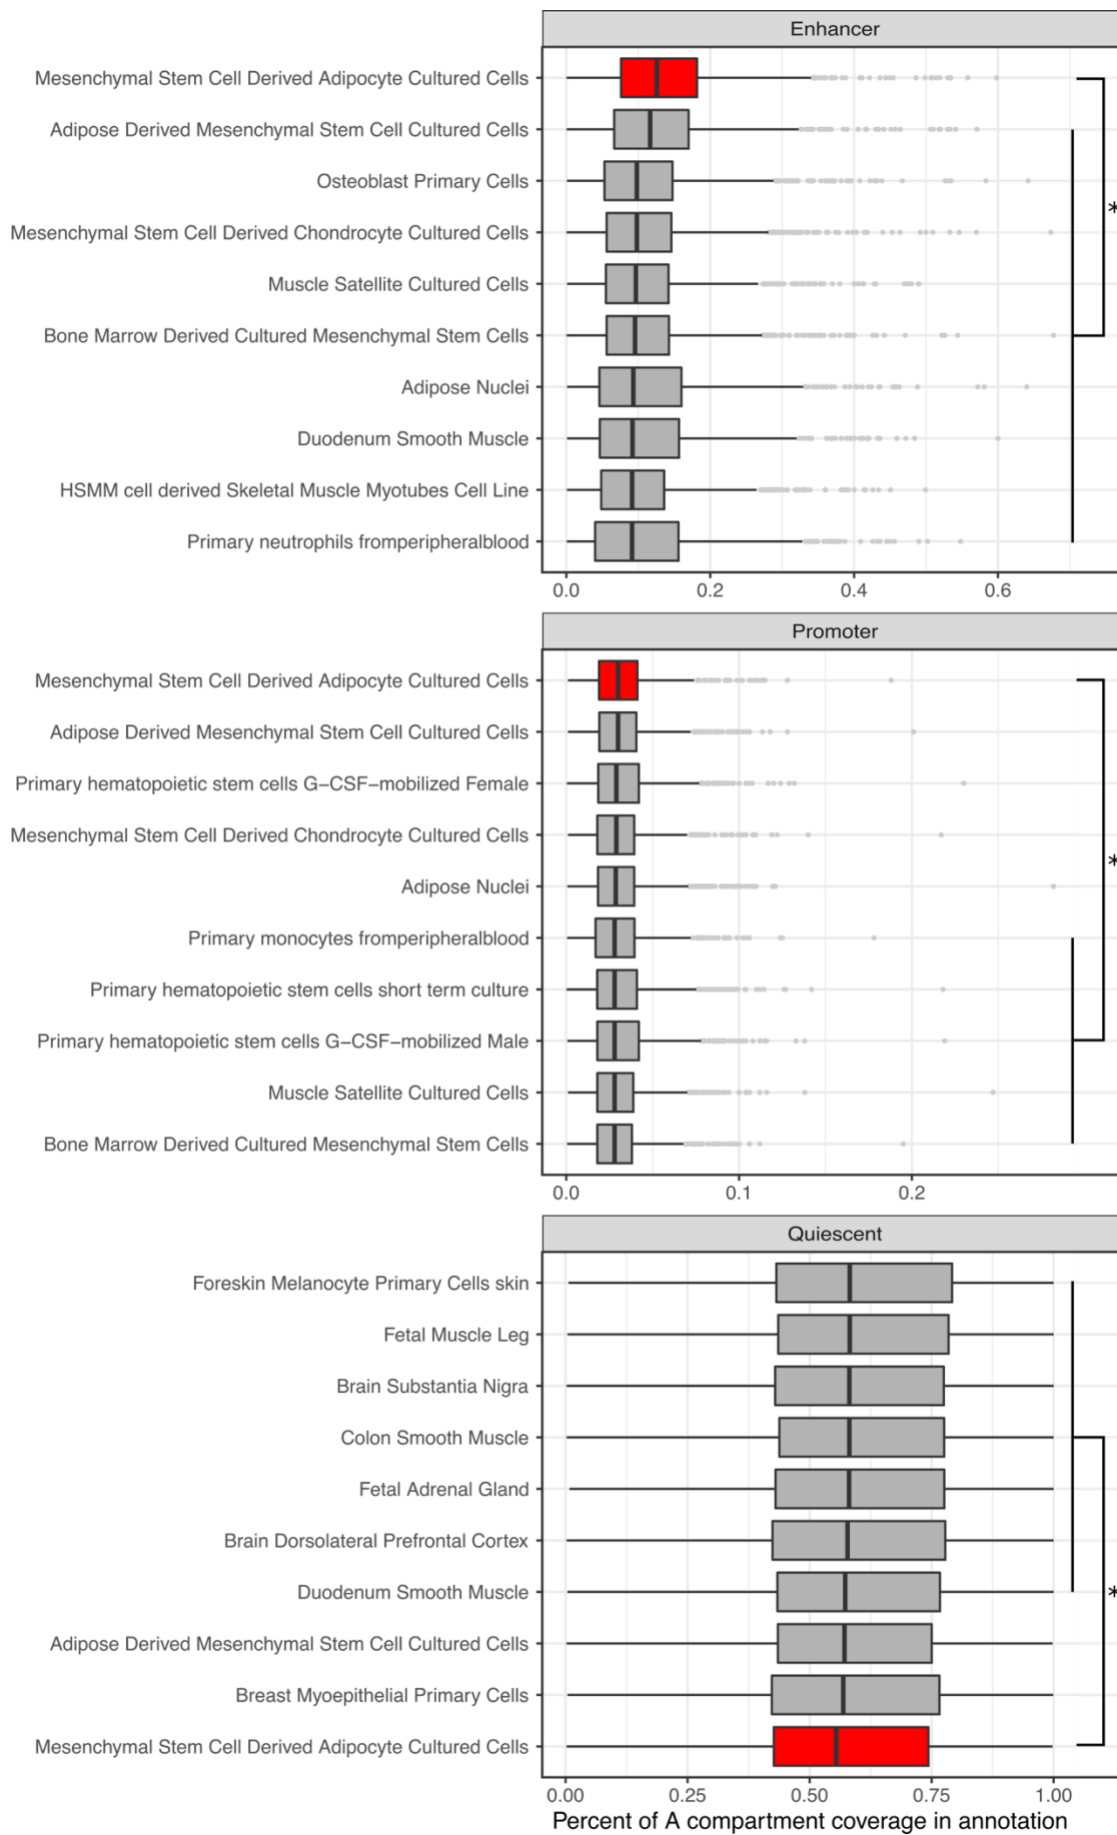

**Supplementary Figure 4. Related to Figure 1. The A compartment coverage of enhancer chromatin states across 127 ENCODE samples highlights the cell-type-specificity of the A compartment identification.**

Boxplots show the coverage of enhancer, promoter, and quiescent ChromHMM<sup>6</sup> chromatin states across all of the A (n=1,551) compartments for the top 10 ENCODE<sup>7</sup> cell or tissue types (for the enhancer and promoter coverage); or the bottom 10 ENCODE cell or tissue types (for the quiescent coverage). The cell-type with the highest coverage of enhancer marks and promoter marks, as well as with the lowest coverage of quiescent marks, is denoted in red (mesenchymal stem cell -derived adipocyte cultured cells (MSC-Ad)). Asterisks correspond to  $p < 0.05$  the two-sided Wilcoxon Rank Sum test, comparing the MSC-Ad cells to all other cell- and tissue types, after correcting for multiple testing using the Benjamini-Hochberg procedure. Boxplot center represents the median coverage of the indicated chromatin state in the preadipocyte A compartments, the upper and lower bounds of the box represent the 75<sup>th</sup> and 25<sup>th</sup> percentile, respectively, and the upper and lower whiskers represent the highest (non-outlier) and lowest (non-outlier) values, respectively. Source data are provided as a Source Data file.



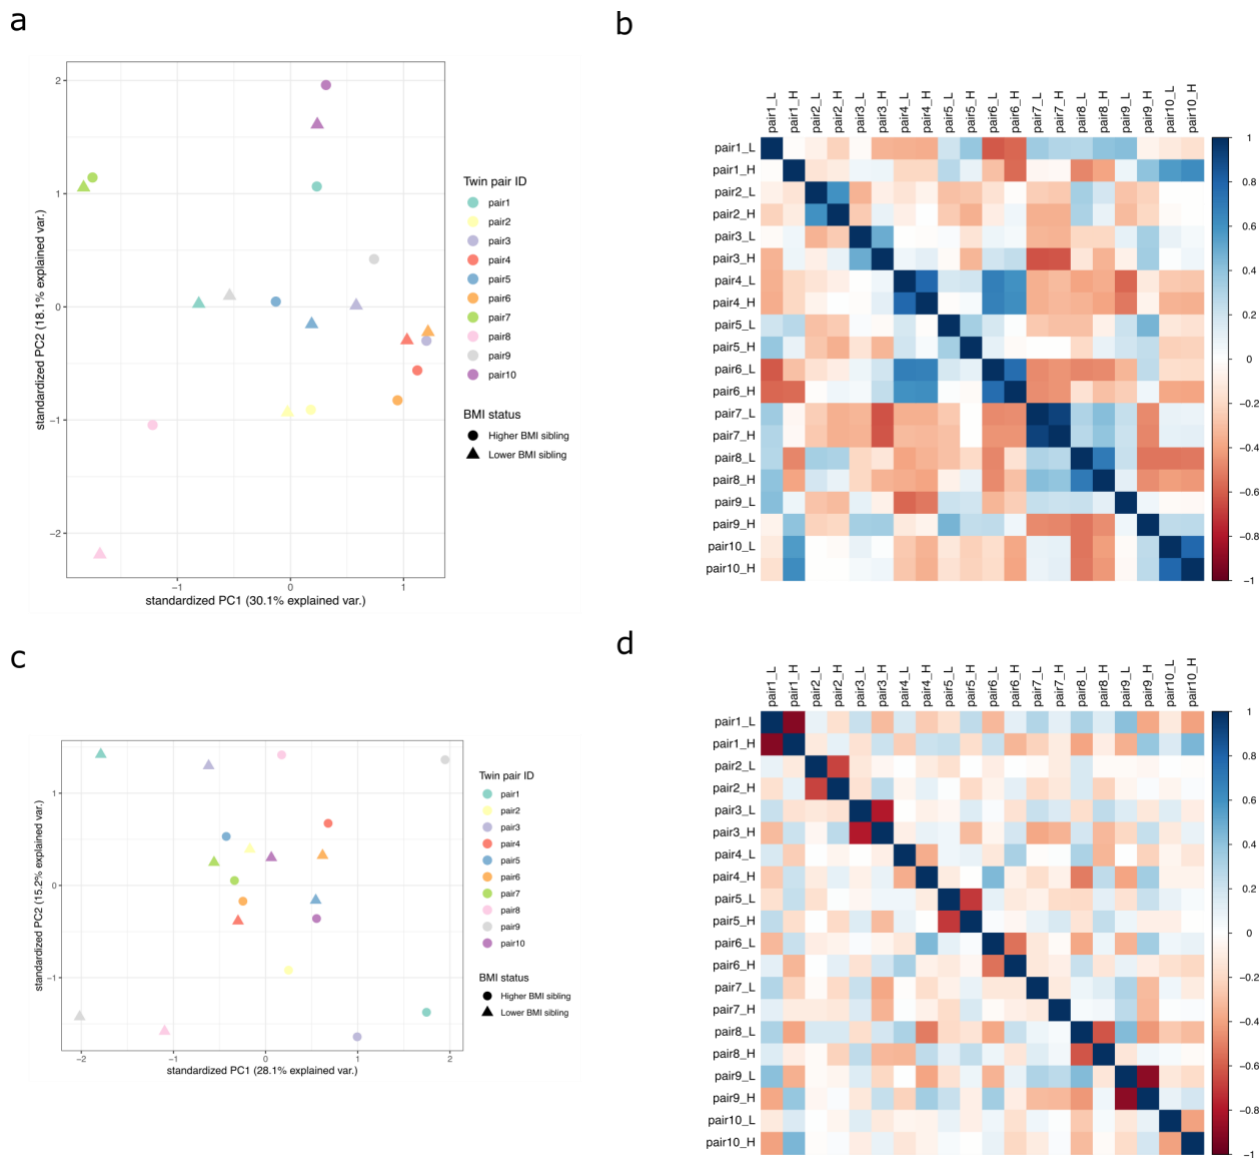

**Supplementary Figure 5. Related to Figure 1.**

RNA-seq sample PCA and pairwise correlations. Gene expression TPMs were first adjusted for sex, age, and median 3' bias to show that these BMI-discordant MZ twin pairs generally cluster near each other in the PCA plot (a) and exhibit positive correlations with each other (b), although this is not the case for all pairs. Gene expression TPMs were adjusted for the family ID as a random effect, sex, age and median 3' bias (see Methods) and the resulting PCA plot (c) and correlation plot (d) are shown, wherein clustering is no longer twin pair ID -dependent. L indicates the lower BMI sibling within the MZ twin

pairs; and H indicates the higher BMI sibling within the MZ twin pairs. Source data are provided as a Source Data file.

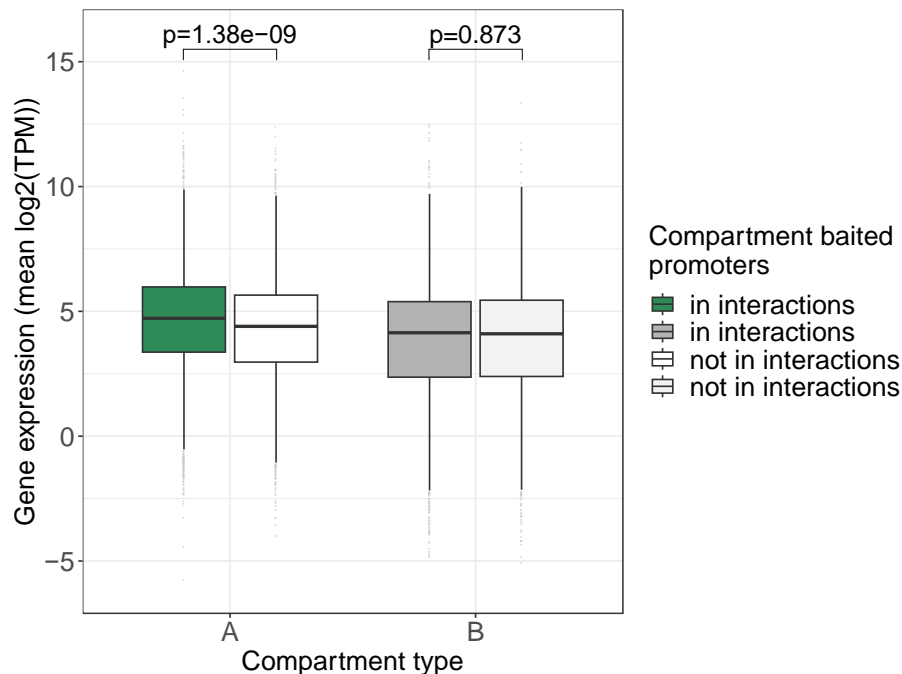

**Supplementary Figure 6. Related to Figure 1. Promoter Capture Hi-C in PAd reveals how promoter interaction effects are dependent upon A/B compartmentalization.**

Boxplot shows the expression of genes either involved in pChI-C interactions (darker) or not (lighter) for genes with promoters in the A compartments (left; n=3,389 expressed genes in interactions; n=2,346 expressed genes not in interactions) or the B compartments (right; n=2,668 expressed genes in interactions; n=2,231 expressed genes not in interactions). *P*-value corresponds to the two-sided Wilcoxon Rank Sum test comparing gene expression within each compartment type separately. Boxplot center represents the median expression of the indicated gene set in the indicated compartment type, the upper and lower bounds of the box represent the 75<sup>th</sup> and 25<sup>th</sup> percentile, respectively, and the upper and lower whiskers represent the highest (non-outlier) and lowest (non-outlier) values, respectively. Source data are provided as a Source Data file.

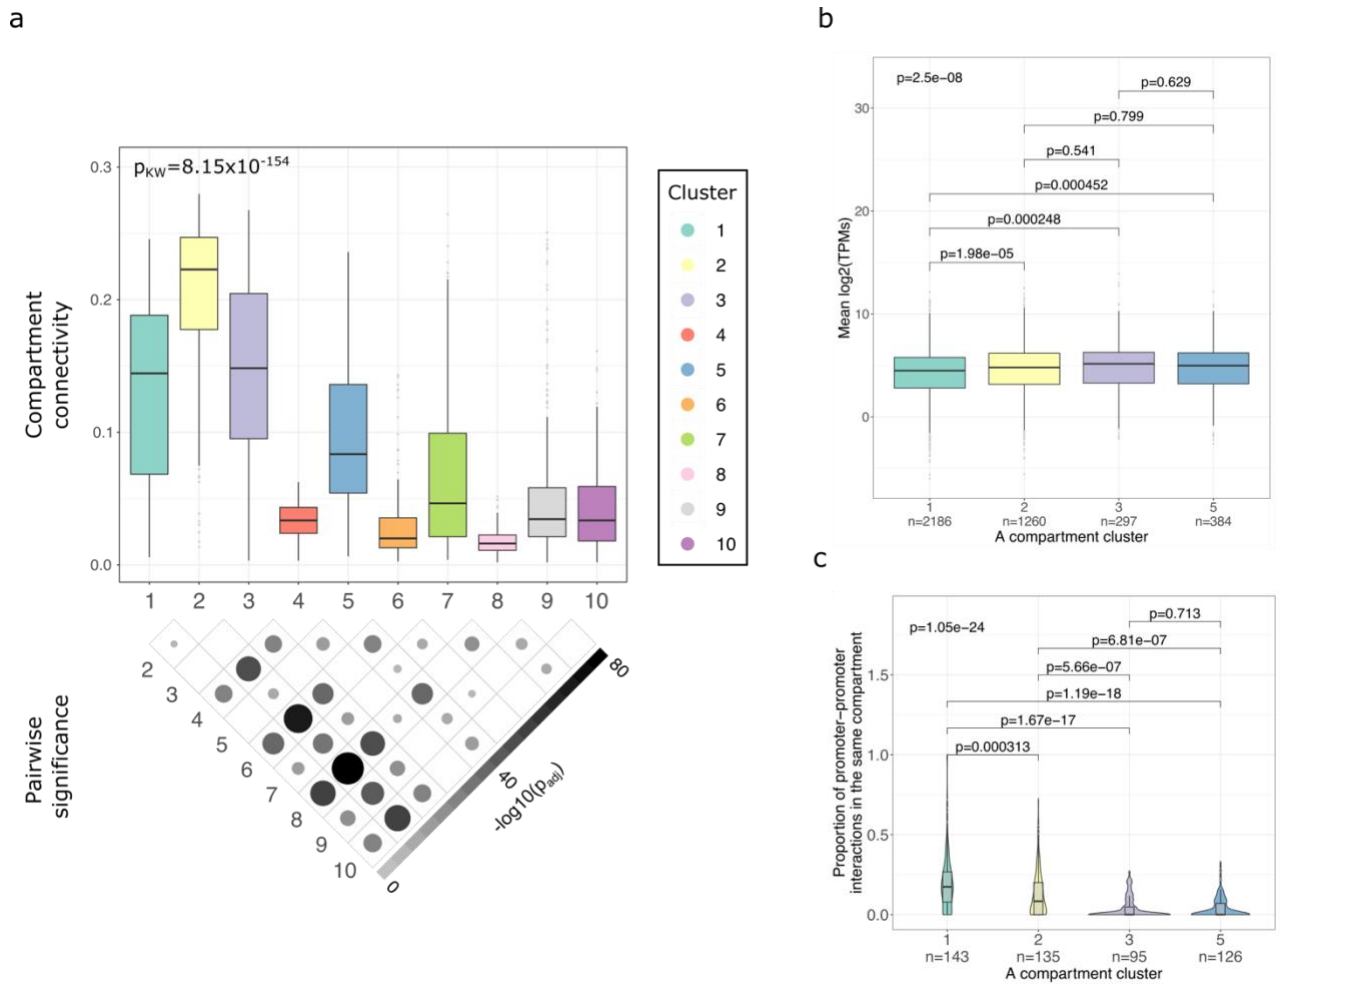

**Supplementary Figure 7. Related to Figure 3. The A compartment clustering stratifies clusters based on the level of co-accessibility and cellular priming, assessed through promoter-promoter interactions and gene expression.**

(a) Boxplots show the co-accessibility distributions across the 10 A compartment clusters. The overall  $p$ -value corresponds to the two-sided Kruskal-Wallis test and the  $p$ -value map below the plot denotes which pairwise differences are significant ( $p_{adj} < 0.05$ ) in the *post hoc* Dunn test, after correcting for multiple testing using the Holm procedure. The number of compartments in each cluster is listed in Supplementary Table 4. (b) Boxplots show the mean gene expression ( $\log_2$ (TPM)) of genes in each of the A compartment clusters. The overall  $p$ -value corresponds to the two-sided Kruskal-Wallis test, and the pairwise significance is determined by the *post hoc* Dunn test, after correcting for multiple testing using the Holm procedure. (c) Violin plots with inlaid boxplots show the proportion of pChI-C interactions

within the same A compartment that are promoter-promoter interactions. The overall  $p$ -value corresponds to the two-sided Kruskal-Wallis test and the pairwise significance is determined by the *post hoc* Dunn test, after correcting for multiple testing using the Holm procedure. Violin plot shows the kernel probability density of the data. For all boxplots, the center represents the median gene density of the compartment type, the upper and lower bounds of the box represent the 75<sup>th</sup> and 25<sup>th</sup> percentile, respectively, and the upper and lower whiskers represent the highest (non-outlier) and lowest (non-outlier) values, respectively. Source data are provided as a Source Data file.

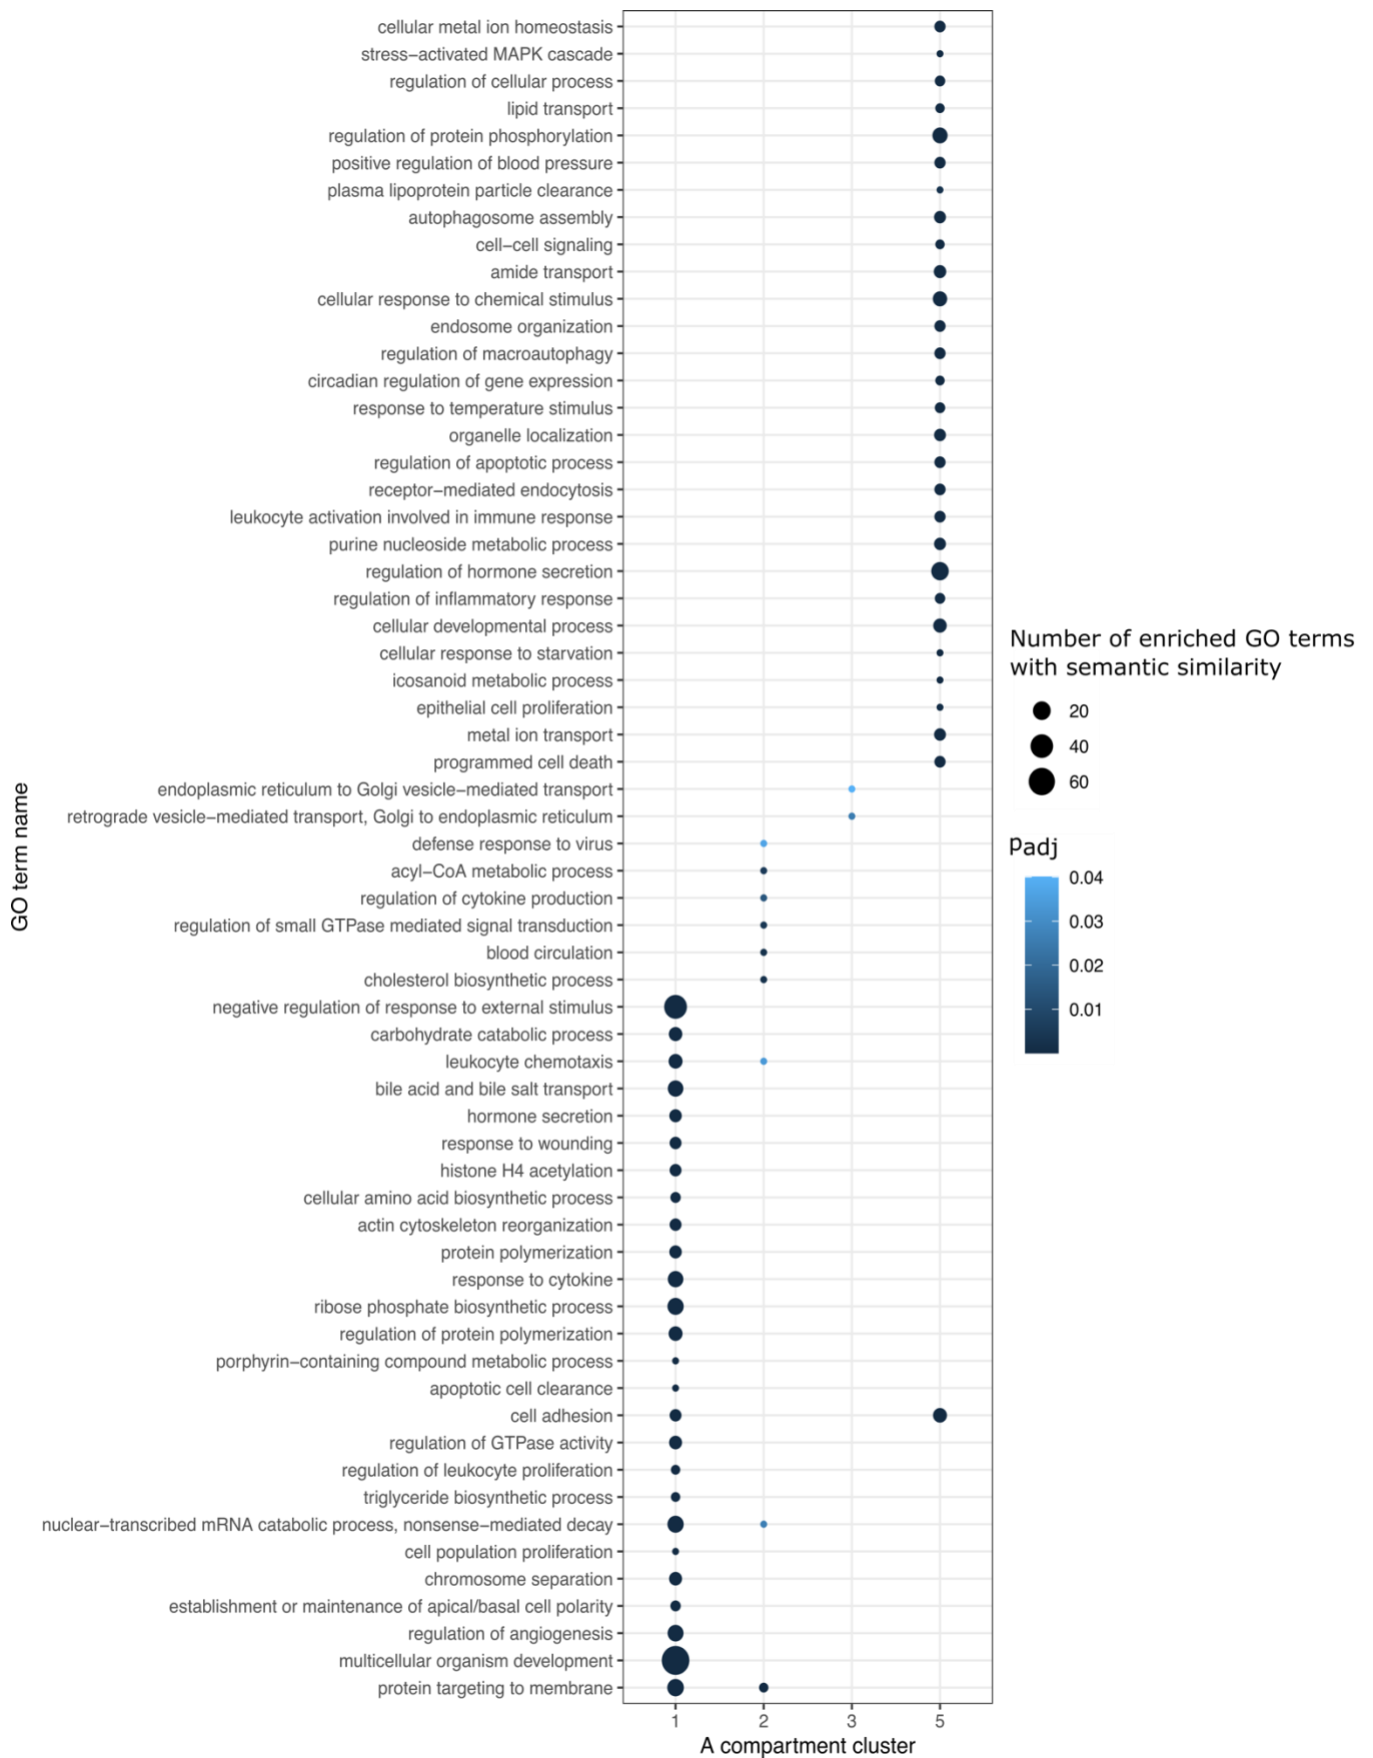

**Supplementary Figure 8. Related to Figure 3. Gene ontology (GO) term enrichment across the A compartment clusters.**

Dot plot shows significantly enriched GO terms related to biological processes in the A compartment clusters 1, 2, 3, and 5. The size of the circle is proportional to how many of the significantly enriched GO terms for that A compartment cluster were listed together after semantic similarity analysis was done to cluster similar GO terms. The semantic similarity analysis was performed using REVIGO<sup>8</sup>. Source data are provided as a Source Data file.

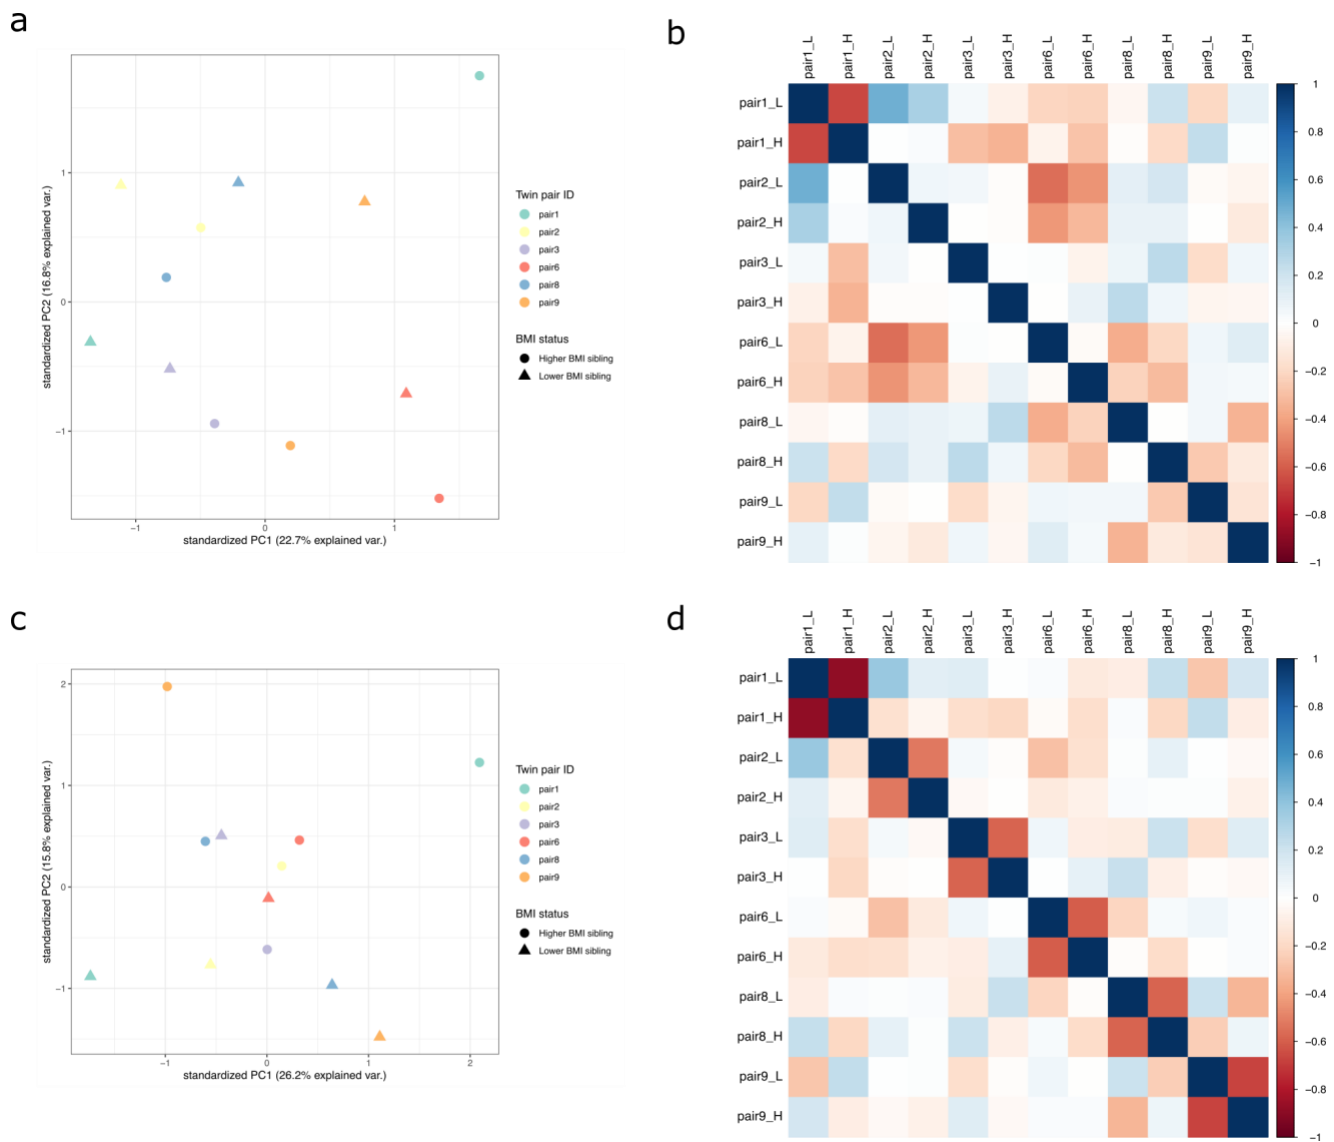

### Supplementary Figure 9. Related to Figure 3.

Differentiating PAd ATAC-seq sample PCA and pairwise correlations on individual peak TPMs. TPMs were first adjusted for sex, age, and fraction of reads in peaks (FRiP); these BMI-discordant MZ twin pairs do not generally cluster near each other in the PCA plot (a) or exhibit strong positive correlations with each other (b). TPMs were adjusted for the family ID as a random effect, sex, age and fraction of reads in peaks (FRiP) (see Methods) and the resulting PCA plot (c) and correlation plot (d) are shown, wherein clustering is not twin pair ID -dependent. L indicates the lower BMI sibling within the MZ twin pairs; and H indicates the higher BMI sibling within the MZ twin pairs. Source data are provided as a Source Data file.



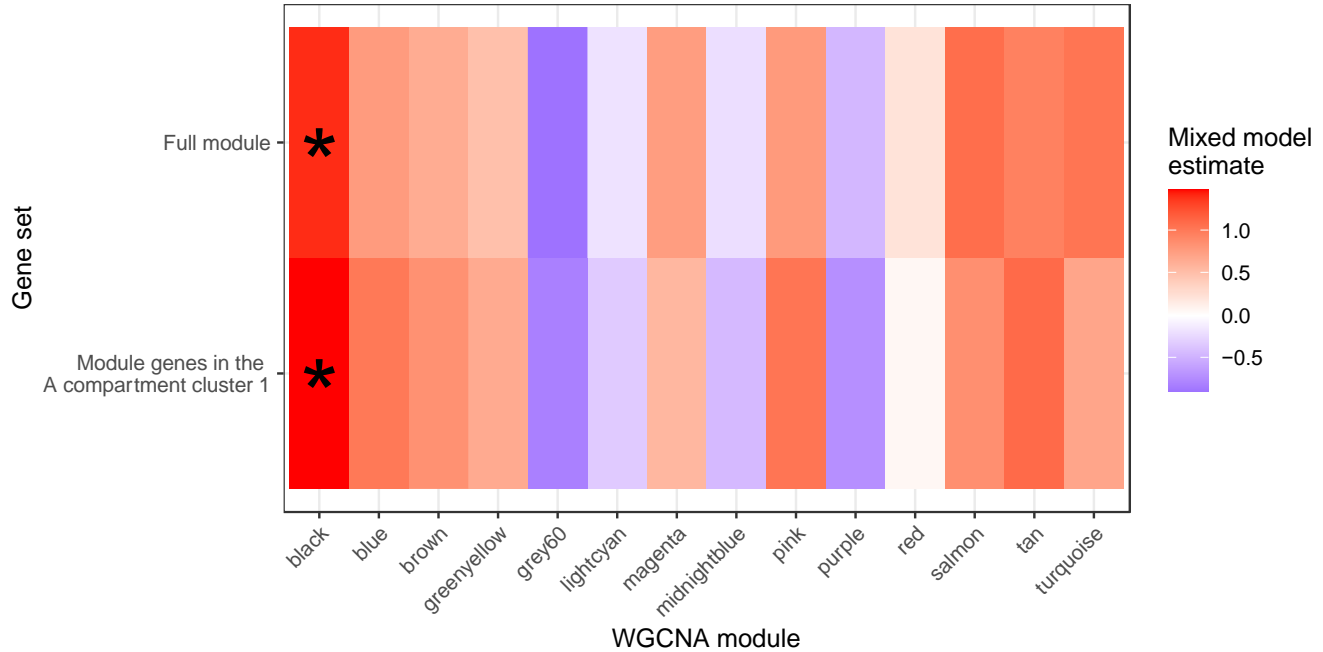

**Supplementary Figure 10. Related to Figure 5. The black gene co-expression module is associated with the BMI status in the BMI-discordant MZ twin pairs.**

Heatmap shows the estimates from a mixed model assessing the effect of the BMI status on the WGCNA<sup>2</sup> gene co-expression module eigengenes (first PC of the module gene expression), while controlling for the twin pair ID as a random effect (see Methods). Only the black gene co-expression module is associated with BMI status in the BMI-discordant MZ twin pairs after correction for multiple testing using the Benjamini-Hochberg procedure ( $*p_{adj} < 0.01$ ). The co-expression modules are randomly assigned color coding for naming the modules, and are directly from the WGCNA output. Source data are provided as a Source Data file.

## Supplementary References

1. Wingett, S. W. *et al.* HiCUP: pipeline for mapping and processing Hi-C data. *F1000Research* **4**, 1310 (2015).
2. Heinz, S. *et al.* Simple combinations of lineage-determining transcription factors prime cis-regulatory elements required for macrophage and B cell identities. *Mol. Cell* **38**, 576–589 (2010).
3. Langfelder, P. & Horvath, S. WGCNA: An R package for weighted correlation network analysis. *BMC Bioinformatics* **9**, 559 (2008).
4. MacArthur, J. *et al.* The new NHGRI-EBI Catalog of published genome-wide association studies (GWAS Catalog). *Nucleic Acids Res.* **45**, D896–D901 (2017).
5. Ewels, P., Magnusson, M., Lundin, S. & Käller, M. MultiQC: Summarize analysis results for multiple tools and samples in a single report. *Bioinformatics* **32**, 3047–3048 (2016).
6. Ernst, J. & Kellis, M. ChromHMM: Automating chromatin-state discovery and characterization. *Nature Methods* vol. 9 (2012).
7. Davis, C. A. *et al.* The Encyclopedia of DNA elements (ENCODE): Data portal update. *Nucleic Acids Res.* **46**, D794–D801 (2018).
8. Supek, F., Bošnjak, M., Škunca, N. & Šmuc, T. Revigo summarizes and visualizes long lists of gene ontology terms. *PLoS One* **6**, e21800 (2011).
